# Supplementary material for: In silico study of inhibitory capacity of sacubitril/valsartan toward neprilysin and angiotensin receptor
Source: Royal Society of Chemistry journal article supplement (doi:10.1039/d2ra04226f), 2022-01-01
Supplement: d2ra04226f1.pdf [file d2ra04226f1.pdf]

## Supplementary Materials

for

### ***In Silico* Study of Inhibitory Capacity of Sacubitril/Valsartan toward Neprilysin and Angiotensin Receptor**

Jelena Đorović Jovanović<sup>\*a</sup>, Marko Antonijević<sup>a</sup>, Radiša Vojinović<sup>b</sup>, Nenad D. Filipović<sup>c</sup> and Zoran Marković<sup>a</sup>

---

<sup>a</sup>Department of Science, Institute for Information Technologies, University of Kragujevac, Jovana Cvijića bb, 34000 Kragujevac, Republic of Serbia.

<sup>b</sup>Faculty of Medical Sciences, University of Kragujevac, Svetozara Markovića 69, 34000 Kragujevac, Republic of Serbia.

<sup>c</sup>Faculty of Engineering, University of Kragujevac, Sestre Janjić 6, 34000 Kragujevac, Republic of Serbia.

Correspondence should be addressed to Jelena R. Đorović Jovanović;

[jelena.djorovic@uni.kg.ac.rs](mailto:jelena.djorovic@uni.kg.ac.rs)

**Table S1** The corresponding amino acid with its position in the structure of neprilysin, distance in Å between respective active sites of SAC and amino acid, its role in bond formation, and type of interaction during bond formation.

| Amino acids from receptor | r (Å) | Category      | Type of interaction        |
|---------------------------|-------|---------------|----------------------------|
| ARG102                    | 1.85  | Hydrogen Bond | Conventional Hydrogen Bond |
| ARG102                    | 1.74  | Hydrogen Bond | Conventional Hydrogen Bond |
| ARG110                    | 1.99  | Hydrogen Bond | Conventional Hydrogen Bond |
| ARG110                    | 2.22  | Hydrogen Bond | Conventional Hydrogen Bond |
| ARG717                    | 2.62  | Hydrogen Bond | Conventional Hydrogen Bond |
| ARG717                    | 1.77  | Hydrogen Bond | Conventional Hydrogen Bond |
| ASN542                    | 2.21  | Hydrogen Bond | Conventional Hydrogen Bond |
| HIS711                    | 2.92  | Hydrogen Bond | Carbon Hydrogen Bond       |
| ALA543                    | 3.50  | Hydrogen Bond | Carbon Hydrogen Bond       |
| HIS583                    | 2.86  | Hydrogen Bond | $\pi$ -Donor Hydrogen Bond |
| HIS587                    | 4.19  | Electrostatic | $\pi$ -Cation              |
| HIS587                    | 4.85  | Hydrophobic   | $\pi$ - $\pi$ Stacked      |
| HIS587                    | 4.59  | Hydrophobic   | $\pi$ - $\pi$ T-shaped     |
| TYR545                    | 2.94  | Other         | $\pi$ -Lone Pair           |

**Table S2** The corresponding amino acid with its position in the structure of angiotensin receptor, distance in Å between respective active sites of VAL and amino acid, its role in bond formation, and type of interaction during bond formation.

| Amino acids from receptor | r (Å) | Category      | Type of interaction        |
|---------------------------|-------|---------------|----------------------------|
| ARG167                    | 1.93  | Hydrogen Bond | Conventional Hydrogen Bond |
| ARG167                    | 2.30  | Hydrogen Bond | Conventional Hydrogen Bond |
| ARG167                    | 3.62  | Electrostatic | $\pi$ -Cation              |
| ARG167                    | 5.26  | Hydrophobic   | $\pi$ -Alkyl               |
| VAL108                    | 3.74  | Electrostatic | $\pi$ -Cation              |
| VAL108                    | 4.22  | Hydrophobic   | Alkyl                      |
| ALA163                    | 3.90  | Hydrophobic   | $\pi$ - $\sigma$           |
| TRP84                     | 5.63  | Hydrophobic   | $\pi$ - $\pi$ T-shaped     |
| TRP84                     | 4.58  | Hydrophobic   | $\pi$ -Alkyl               |
| TRP84                     | 5.43  | Hydrophobic   | $\pi$ -Alkyl               |
| TRP84                     | 4.46  | Hydrophobic   | $\pi$ -Alkyl               |
| LEU81                     | 5.49  | Hydrophobic   | Alkyl                      |
| TYR35                     | 5.18  | Hydrophobic   | $\pi$ -Alkyl               |
| PHE77                     | 4.71  | Hydrophobic   | $\pi$ -Alkyl               |
| TYR87                     | 4.88  | Hydrophobic   | $\pi$ -Alkyl               |

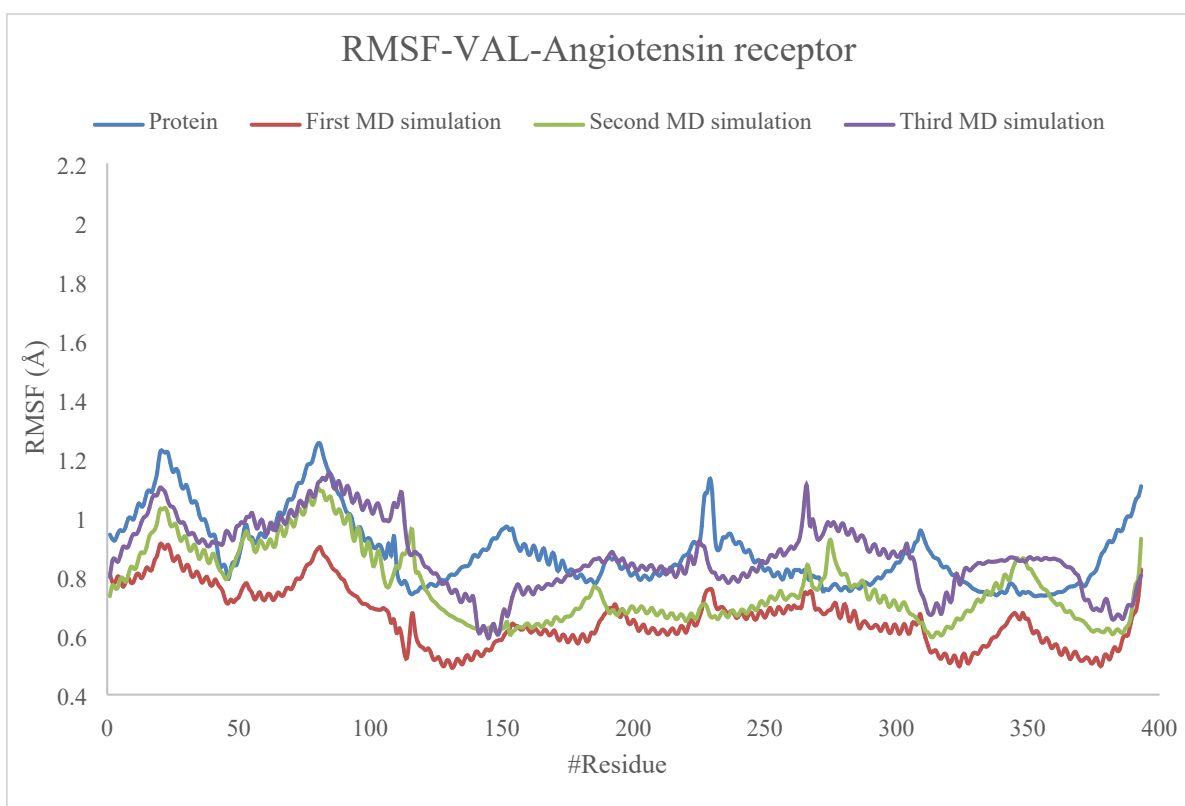

**Figure S1.** RMSF values obtained by MD simulations of angiotensin receptor and VAL-Angiotensin receptor complex

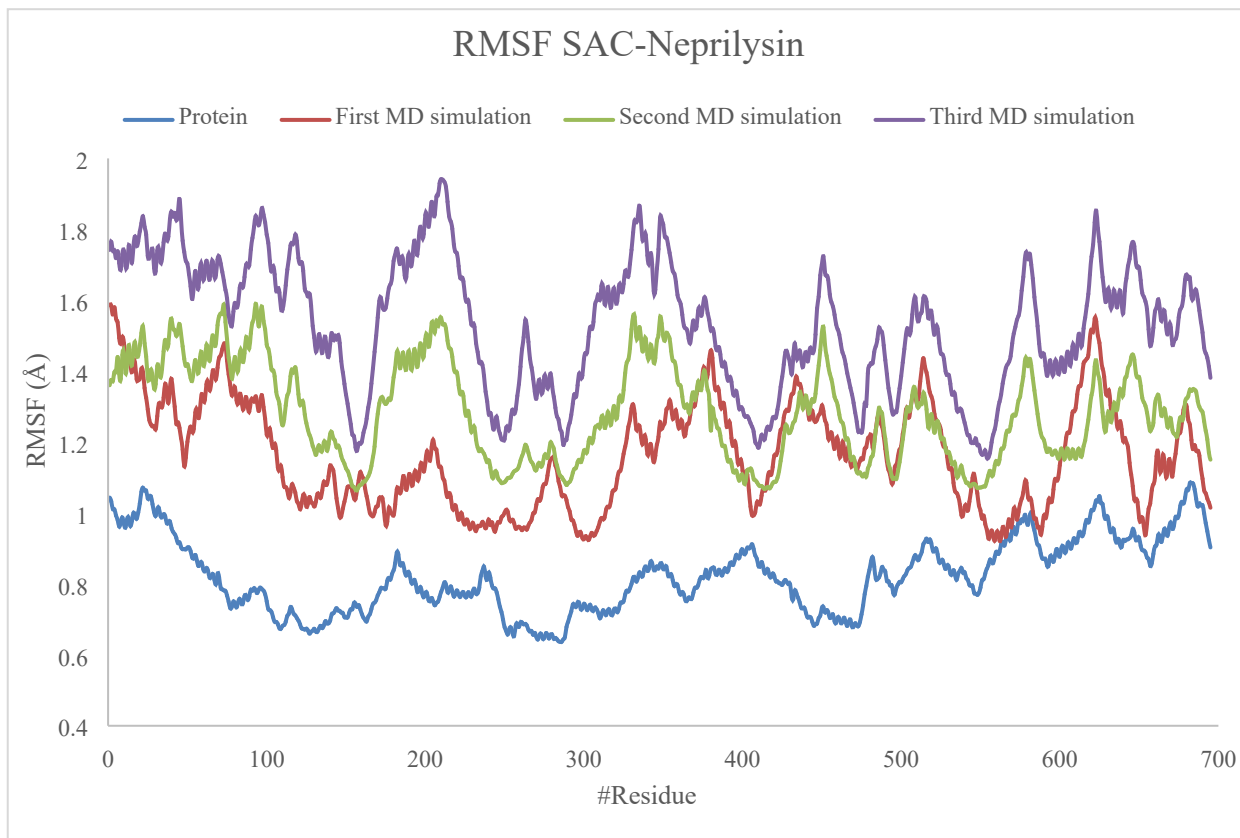

**Figure S2.** RMSF values obtained by MD simulations of neprilysin and SAC-Nepilysin system
